# Supplementary material
Source: PubMed Central journal article supplement (PMC3668329)
Supplement: NIHMS475518-supplement-07.pdf [file NIHMS475518-supplement-07.pdf]

Supplemental Table 1. Fully Adjusted (Regression Model 3) Results Relating Problem-Gambling Severity to Incident Hypomania, Generalized-Anxiety Disorder, and Substance-Use Disorders Amongst Older Adults

| Study variable                    | Incident Hypomania |           | Incident Generalized-Anxiety Disorder |           | Incident Any Substance-Use Disorder |           |
|-----------------------------------|--------------------|-----------|---------------------------------------|-----------|-------------------------------------|-----------|
|                                   | OR                 | 95% CI    | OR                                    | 95% CI    | OR                                  | 95% CI    |
| <b>Problem-gambling severity</b>  |                    |           |                                       |           |                                     |           |
| NG/LFG                            | 1.00               | --        | 1.00                                  | --        | 1.00                                | --        |
| LRG                               | 0.33               | 0.13-0.81 | 1.19                                  | 0.82-1.75 | 0.92                                | 0.66-1.29 |
| ARPG                              | 0.66               | 0.16-2.67 | 2.51                                  | 1.24-5.06 | 2.61                                | 1.38-4.94 |
| <b>Current Age, Years</b>         | 0.97               | 0.94-1.00 | 0.97                                  | 0.94-0.99 | 0.93                                | 0.91-0.96 |
| <b>Gender</b>                     |                    |           |                                       |           |                                     |           |
| Male                              | 1.00               | --        | 1.00                                  | --        | 1.00                                | --        |
| Female                            | 1.26               | 0.66-2.40 | 2.77                                  | 1.90-4.02 | 0.65                                | 0.47-0.89 |
| <b>Race</b>                       |                    |           |                                       |           |                                     |           |
| White                             | 1.00               | --        | 1.00                                  | --        | 1.00                                | --        |
| Black                             | 3.72               | 1.93-7.15 | 0.87                                  | 0.57-1.32 | 0.90                                | 0.61-1.32 |
| Other                             | 0.45               | 0.06-3.49 | 1.44                                  | 0.75-2.78 | 1.05                                | 0.33-3.39 |
| Hispanic                          | 1.06               | 0.27-4.24 | 0.76                                  | 0.45-1.31 | 0.79                                | 0.42-1.47 |
| <b>Marital status</b>             |                    |           |                                       |           |                                     |           |
| Married                           | 1.00               | --        | 1.00                                  | --        | 1.00                                | --        |
| Formerly married                  | 0.70               | 0.32-1.54 | 0.81                                  | 0.52-1.27 | 1.32                                | 0.99-1.76 |
| Never                             | 1.60               | 0.61-4.22 | 1.38                                  | 0.72-2.66 | 2.05                                | 1.19-3.55 |
| <b>Education</b>                  |                    |           |                                       |           |                                     |           |
| Less than high school             | 1.20               | 0.57-2.55 | 1.47                                  | 0.98-2.20 | 0.91                                | 0.62-1.33 |
| High school                       | 1.00               | --        | 1.00                                  | --        | 1.00                                | --        |
| Some college                      | 1.01               | 0.46-2.21 | 1.16                                  | 0.75-1.82 | 0.88                                | 0.56-1.37 |
| College and above                 | 1.68               | 0.70-4.04 | 1.06                                  | 0.67-1.68 | 0.59                                | 0.35-0.98 |
| <b>Employment</b>                 |                    |           |                                       |           |                                     |           |
| Full time                         | 1.00               | --        | 1.00                                  | --        | 1.00                                | --        |
| Part time                         | 1.52               | 0.51-4.50 | 1.42                                  | 0.75-2.68 | 1.17                                | 0.68-1.99 |
| Other                             | 1.03               | 0.51-2.09 | 1.46                                  | 0.87-2.47 | 1.42                                | 0.93-2.15 |
| <b>Income</b>                     |                    |           |                                       |           |                                     |           |
| <\$20,000                         | 1.00               | --        | 1.00                                  | --        | 1.00                                | --        |
| \$20,000 to <\$35,000             | 1.18               | 0.56-2.48 | 1.04                                  | 0.68-1.59 | 1.02                                | 0.71-1.47 |
| \$35,000 to <\$70,000             | 0.69               | 0.30-1.61 | 0.99                                  | 0.57-1.71 | 1.41                                | 0.95-2.11 |
| >=\$70,000                        | 0.83               | 0.34-2.05 | 0.84                                  | 0.41-1.72 | 0.95                                | 0.51-1.77 |
| <b>Any Mood Disorder</b>          |                    |           |                                       |           |                                     |           |
| Yes                               |                    |           | 6.17                                  | 4.14-9.18 | 0.96                                | 0.50-1.83 |
| No                                |                    |           | 1.00                                  | --        | 1.00                                | --        |
| <b>Any Anxiety Disorder</b>       |                    |           |                                       |           |                                     |           |
| Yes                               | 1.44               | 0.63-3.30 |                                       |           | 1.24                                | 0.72-2.14 |
| No                                | 1.00               | --        |                                       |           | 1.00                                | --        |
| <b>Any Substance-Use Disorder</b> |                    |           |                                       |           |                                     |           |
| Yes                               | 0.99               | 0.28-2.57 | 1.17                                  | 0.67-2.03 |                                     |           |
| No                                | 1.00               | --        | 1.00                                  | --        |                                     |           |
| <b>Medical conditions</b>         | 1.31               | 1.09-1.57 | 1.16                                  | 1.02-1.32 | 1.13                                | 0.99-1.29 |
| <b>Stressful life events</b>      | 1.35               | 1.16-1.57 | 1.12                                  | 1.00-1.26 | 1.09                                | 0.97-1.23 |
| <b>SF-12 Physical Functioning</b> | 1.01               | 0.99-1.04 | 0.99                                  | 0.98-1.01 | 1.00                                | 0.99-1.01 |

|                            |      |            |      |           |       |             |
|----------------------------|------|------------|------|-----------|-------|-------------|
| <b>Tobacco use</b>         |      |            |      |           |       |             |
| Current user               | 2.01 | 0.81-4.98  | 0.56 | 0.33-0.96 | 18.98 | 13.40-26.88 |
| Former user                | 1.39 | 0.59-3.27  | 0.89 | 0.61-1.29 | 1.01  | 0.63-1.61   |
| Lifetime non-user          | 1.00 | --         | 1.00 | --        | 1.00  | --          |
| <b>Alcohol consumption</b> |      |            |      |           |       |             |
| Current drinker            | 0.99 | 0.42-2.34  | 1.06 | 0.69-1.62 | 1.53  | 0.97-2.43   |
| Former drinker             | 1.13 | 0.49-2.64  | 1.05 | 0.67-1.64 | 1.13  | 0.71-1.80   |
| Lifetime abstainer         | 1.00 | --         | 1.00 | --        | 1.00  | --          |
| <b>Drug use</b>            |      |            |      |           |       |             |
| Current user               | 3.78 | 0.89-16.05 | 0.96 | 0.36-2.55 | 1.67  | 0.60-4.68   |
| Former user                | 1.94 | 0.61-6.21  | 1.11 | 0.60-2.07 | 1.40  | 0.59-3.30   |
| Lifetime non-user          | 1.00 | --         | 1.00 | --        | 1.00  | --          |

LFG/NG= Low-frequency gambling/Non-gambling; LRG= Low-risk gambling; ARPG=At-risk/problem gambling; SF-12 = Short-Form-12

OR=odds ratio; CI=confidence interval

Supplemental Table 2. Analysis of Attrition

| Wave 1 study variable             | Did Not Complete vs. Completed Wave 2 <sup>a</sup> |           |                |
|-----------------------------------|----------------------------------------------------|-----------|----------------|
|                                   | OR                                                 | 95% CI    | P <sup>b</sup> |
| <b>Problem-gambling severity</b>  |                                                    |           | .0577          |
| NG/LFG                            | 1.00                                               | --        |                |
| LRG                               | 0.90                                               | 0.79-1.03 |                |
| ARPG                              | 0.67                                               | 0.45-1.00 |                |
| <b>Current age, years</b>         | 1.04                                               | 1.04-1.05 | <.0001         |
| <b>Gender</b>                     |                                                    |           |                |
| Male                              | 1.00                                               | --        |                |
| Female                            | 0.77                                               | 0.68-0.88 |                |
| <b>Race</b>                       |                                                    |           | .0526          |
| White                             | 1.00                                               | --        |                |
| Black                             | 1.13                                               | 0.95-1.33 |                |
| Other                             | 1.24                                               | 0.93-1.67 |                |
| Hispanic                          | 1.28                                               | 1.02-1.62 |                |
| <b>Marital status</b>             |                                                    |           | <.0001         |
| Married/living as married         | 1.00                                               | --        |                |
| Formerly married                  | 1.31                                               | 1.17-1.47 |                |
| Never                             | 1.37                                               | 1.09-1.73 |                |
| <b>Education</b>                  |                                                    |           | .0146          |
| Less than high school             | 1.07                                               | 0.92-1.23 |                |
| High school                       | 1.00                                               | --        |                |
| Some college                      | 0.83                                               | 0.72-0.97 |                |
| College and above                 | 0.74                                               | 0.70-1.01 |                |
| <b>Employment</b>                 |                                                    |           | .0080          |
| Full time                         | 1.00                                               | --        |                |
| Part time                         | 0.65                                               | 0.49-0.85 |                |
| Other                             | 0.89                                               | 0.74-1.06 |                |
| <b>Income</b>                     |                                                    |           | .1564          |
| <\$20,000                         | 1.00                                               | --        |                |
| \$20,000 to <\$35,000             | 1.05                                               | 0.91-1.20 |                |
| \$35,000 to <\$70,000             | 0.90                                               | 0.75-1.08 |                |
| ≥\$70,000                         | 0.80                                               | 0.62-1.04 |                |
| <b>Any Mood Disorder</b>          |                                                    |           | .0971          |
| Yes                               | 1.22                                               | 0.96-1.54 |                |
| No                                | 1.00                                               | --        |                |
| <b>Any Anxiety Disorder</b>       |                                                    |           | .5503          |
| Yes                               | 0.95                                               | 0.78-1.14 |                |
| No                                | 1.00                                               | --        |                |
| <b>Any Substance-Use Disorder</b> |                                                    |           | .2625          |
| Yes                               | 1.14                                               | 0.90-1.44 |                |
| No                                | 1.00                                               | --        |                |
| <b>Medical conditions</b>         | 0.97                                               | 0.93-1.02 | .2037          |
| <b>Stressful life events</b>      | 0.89                                               | 0.85-0.94 | <.0001         |

|                                    |      |           |                  |
|------------------------------------|------|-----------|------------------|
| <b>SF-12 Physical Health score</b> | 0.98 | 0.97-0.98 | <b>&lt;.0001</b> |
| <b>Tobacco use</b>                 |      |           | <b>.2820</b>     |
| Current user                       | 1.13 | 0.93-1.37 |                  |
| Former user                        | 0.97 | 0.84-1.11 |                  |
| Lifetime non-user                  | 1.00 | --        |                  |
| <b>Alcohol consumption</b>         |      |           | <b>.2065</b>     |
| Current drinker                    | 0.92 | 0.80-1.06 |                  |
| Former drinker                     | 1.03 | 0.89-1.19 |                  |
| Lifetime abstainer                 | 1.00 | --        |                  |
| <b>Drug use</b>                    |      |           | <b>.0317</b>     |
| Current user                       | 0.70 | 0.47-1.04 |                  |
| Former user                        | 0.75 | 0.56-0.99 |                  |
| Lifetime non-user                  | 1.00 | --        |                  |

<sup>a</sup> Model is fully adjusted for all Wave 1 study variables

<sup>b</sup> *p*-value from Wald F-test

LFG/NG= Low-frequency gambling/Non-gambling; LRG= Low-risk gambling; ARPG=At-risk/problem gambling; OR=odds ratio; CI=confidence interval

Bold values indicate statistically significant results (p<.05)
